# Supplementary material
Source: publisher site journal article supplement (https://www.dovepress.com/article/239511)
Supplement: Supplementary file 1 [file get_supplementary_file.php]

**Supplemental Table 1.** List of study exposures included in the study.

| **Study Drugs** |  |
| --- | --- |
| Apremilast |  |
| Tumor necrosis factor inhibitor [TNF-i] biologics | |
| Adalimumab | Golimumab |
| Certolizumab | Infliximab |
| Etanercept |  |
| Interleukin-17, -23 and -12/23 inhibitor [IL-i] biologics | |
| Brodalumab | Secukinumab |
| Guselkumab | Tildrakizumab |
| Ixekizumab | Ustekinumab |
| Conventional DMARDs |  |
| Cyclosporine | Methotrexate |
| Corticosteroids (systemic only) |  |
| Betamethasone | Prednisolone |
| Dexamethasone | Prednisone |
| Hydrocortisone | Triamcinolone |
| Methylprednisolone |  |

**Supplemental Table 2**. List of treatments for herpes zoster, hepatitis C, and tuberculosis

| **Herpes virus treatments** |  |
| --- | --- |
| Acyclovir |  |
| Famciclovir |  |
| Valacyclovir |  |
| **Hepatitis C treatments** |  |
| Boceprevir | Sofosbuvir |
| Daclatasvir | Telaprevir |
| Interferon alpha-2b / ribavirin | Elbasvir / grazoprevir |
| Interferon alphacon-1 | Ledipasvir / sofosbuvir |
| Pegylated interferon alpha-2a | Sofosbuvir / velpatasvir |
| Pegylated interferon alpha-2b | Ombitasvir / paritaprevir / ritonavir |
| Ribavirin | Ombitasvir / paritaprevir / ritonavir / dasabuvir |
| Simeprevir |  |
| **Tuberculosis treatments** |  |
| Bedaquiline | Rifampin |
| Ethambutol | Isoniazid/Pyridoxine |
| Isoniazid | Isoniazid/Rifampin |
| Linezolid | Isoniazid/Pyrazinamide/Rifampin |
| Pyrazinamide |  |
